# Supplementary material for: Alu Deletions in LAMA2 and CDH4 Genes Are Key Components of Polygenic Predictors of Longevity
Source: MDPI journal article supplement (doi:10.3390/ijms232113492), 2022-11-04
Supplement: s1 [file s1]

**Supplementary Table S1.** Results of a pairwise comparative analysis of the genotype/alleles frequencies of the Alu-polymorphic locus Ya5ACE of *ACE* gene in the different age groups.

| Age group       | Genotype/<br>allele | Young<br>Adults | Middle-age<br>Adults | Elderly | Old   |
|-----------------|---------------------|-----------------|----------------------|---------|-------|
| Young           | DD                  | —               | —                    | —       | —     |
|                 | DI                  | —               | —                    | —       | —     |
|                 | II                  | —               | —                    | —       | —     |
|                 | D / I               | —               | —                    | —       | —     |
| Middle-<br>aged | DD                  | 0.705           | —                    | —       | —     |
|                 | DI                  | 0.124           | —                    | —       | —     |
|                 | II                  | 0.145           | —                    | —       | —     |
|                 | D / I               | 0.585           | —                    | —       | —     |
| Elderly         | DD                  | 1.000           | 0.696                | —       | —     |
|                 | DI                  | 0.939           | 0.094                | —       | —     |
|                 | II                  | 0.928           | 0.132                | —       | —     |
|                 | D / I               | 1.000           | 0.573                | —       | —     |
| Old seniors     | DD                  | 0.887           | 0.605                | 0.940   | —     |
|                 | DI                  | 0.604           | <b>0.028</b>         | 0.732   | —     |
|                 | II                  | 0.705           | 0.051                | 0.811   | —     |
|                 | D / I               | 0.891           | 0.471                | 0.961   | —     |
| Long-livers     | DD                  | 0.393           | 0.665                | 0.377   | 0.263 |
|                 | DI                  | 0.445           | 0.503                | 0.381   | 0.187 |
|                 | II                  | 1.000           | 0.195                | 1.000   | 0.787 |
|                 | D / I               | 0.548           | 0.279                | 0.577   | 0.583 |

Here and in Tables 2-10: results in bold type correspond to  $P < 0.05$

**Supplementary Table S2.** Results of a pairwise comparative analysis of the genotype/alleles frequencies of the Alu-polymorphic locus Ya5NBC182 of *HECW1* gene in the different age groups.

| Age group       | Genotype/<br>allele | Young<br>Adults | Middle-age<br>Adults | Elderly      | Old   |
|-----------------|---------------------|-----------------|----------------------|--------------|-------|
| Young           | DD                  | —               | —                    | —            | —     |
|                 | DI                  | —               | —                    | —            | —     |
|                 | II                  | —               | —                    | —            | —     |
|                 | D / I               | —               | —                    | —            | —     |
| Middle-<br>aged | DD                  | <b>0.016</b>    | —                    | —            | —     |
|                 | DI                  | 0.226           | —                    | —            | —     |
|                 | II                  | 0.826           | —                    | —            | —     |
|                 | D / I               | 0.190           | —                    | —            | —     |
| Elderly         | DD                  | <b>0.003</b>    | 1.000                | —            | —     |
|                 | DI                  | 0.368           | 0.591                | —            | —     |
|                 | II                  | 0.319           | 0.589                | —            | —     |
|                 | D / I               | <b>0.029</b>    | 0.698                | —            | —     |
| Old seniors     | DD                  | 0.126           | 0.192                | 0.081        | —     |
|                 | DI                  | 0.228           | 0.691                | 0.819        | —     |
|                 | II                  | 0.873           | 0.624                | 0.148        | —     |
|                 | D / I               | 0.589           | 0.305                | <b>0.044</b> | —     |
| Long-livers     | DD                  | 0.853           | 0.073                | <b>0.029</b> | 0.315 |
|                 | DI                  | 1.000           | 0.281                | 0.476        | 0.350 |
|                 | II                  | 0.917           | 0.905                | 0.473        | 0.781 |
|                 | D / I               | 0.874           | 0.289                | 0.087        | 0.835 |

**Supplementary Table S3.** Results of a pairwise comparative analysis of the genotype/alleles frequencies of the Alu-polymorphic locus Yb8NBC597 of *SEMA6A* gene in the different age groups.

| Age group       | Genotype/<br>allele | Young<br>Adults | Middle-age<br>Adults | Elderly      | Old   |
|-----------------|---------------------|-----------------|----------------------|--------------|-------|
| Young           | DD                  | —               | —                    | —            | —     |
|                 | DI                  | —               | —                    | —            | —     |
|                 | II                  | —               | —                    | —            | —     |
|                 | D / I               | —               | —                    | —            | —     |
| Middle-<br>aged | DD                  | 0.275           | —                    | —            | —     |
|                 | DI                  | 0.145           | —                    | —            | —     |
|                 | II                  | 0.412           | —                    | —            | —     |
|                 | D / I               | 0.518           | —                    | —            | —     |
| Elderly         | DD                  | 0.204           | 1.000                | —            | —     |
|                 | DI                  | 0.092           | 0.908                | —            | —     |
|                 | II                  | 0.377           | 1.000                | —            | —     |
|                 | D / I               | 0.487           | 1.000                | —            | —     |
| Old seniors     | DD                  | 0.752           | 0.373                | 0.275        | —     |
|                 | DI                  | 0.292           | 0.410                | 0.371        | —     |
|                 | II                  | 0.154           | 1.000                | 0.740        | —     |
|                 | D / I               | 0.843           | 0.408                | 0.294        | —     |
| Long-livers     | DD                  | 0.368           | 0.063                | <b>0.035</b> | 0.178 |
|                 | DI                  | 0.757           | 0.273                | 0.292        | 0.641 |
|                 | II                  | <b>0.006</b>    | 0.138                | 0.053        | 0.077 |
|                 | D / I               | 0.059           | <b>0.029</b>         | <b>0.010</b> | 0.055 |

**Supplementary Table S4.** Results of a pairwise comparative analysis of the genotype/alleles frequencies of the Alu-polymorphic locus Yb8NBC516 of *CDH4* gene in the different age groups.

| Age group       | Genotype/<br>allele | Young<br>Adults | Middle-age<br>Adults | Elderly      | Old                       |
|-----------------|---------------------|-----------------|----------------------|--------------|---------------------------|
| Young           | DD                  | —               | —                    | —            | —                         |
|                 | DI                  | —               | —                    | —            | —                         |
|                 | II                  | —               | —                    | —            | —                         |
|                 | D / I               | —               | —                    | —            | —                         |
| Middle-<br>aged | DD                  | 0.166           | —                    | —            | —                         |
|                 | DI                  | 1.000           | —                    | —            | —                         |
|                 | II                  | 0.204           | —                    | —            | —                         |
|                 | D / I               | 0.075           | —                    | —            | —                         |
| Elderly         | DD                  | 0.799           | 0.233                | —            | —                         |
|                 | DI                  | 1.000           | 1.000                | —            | —                         |
|                 | II                  | 0.762           | 0.317                | —            | —                         |
|                 | D / I               | 0.719           | 0.139                | —            | —                         |
| Old seniors     | DD                  | 0.286           | <b>0.011</b>         | 0.143        | —                         |
|                 | DI                  | 0.387           | 0.579                | 0.408        | —                         |
|                 | II                  | 0.931           | 0.175                | 0.802        | —                         |
|                 | D / I               | 0.615           | <b>0.019</b>         | 0.336        | —                         |
| Long-livers     | DD                  | 0.070           | 0.886                | 0.105        | <b>0.001</b>              |
|                 | DI                  | 0.591           | 0.702                | 0.602        | 0.927                     |
|                 | II                  | <b>0.027</b>    | 0.584                | 0.052        | <b>0.015</b>              |
|                 | D / I               | <b>0.008</b>    | 0.653                | <b>0.018</b> | <b>3×10<sup>-4</sup>*</b> |

Here and in Tables 10: \* indicates P-value that retain statistical significance after adjusting for multiple comparisons ( $P_{\text{Bonf}} < 0.05$ ).

**Supplementary Table S5.** Results of a pairwise comparative analysis of the genotype/alleles frequencies of the Alu-polymorphic locus Ya5ac2145 of *STK38L* gene in the different age groups.

| Age group       | Genotype/<br>allele | Young<br>Adults | Middle-age<br>Adults | Elderly | Old   |
|-----------------|---------------------|-----------------|----------------------|---------|-------|
| Young           | DD                  | —               | —                    | —       | —     |
|                 | DI                  | —               | —                    | —       | —     |
|                 | II                  | —               | —                    | —       | —     |
|                 | D / I               | —               | —                    | —       | —     |
| Middle-<br>aged | DD                  | 0.691           | —                    | —       | —     |
|                 | DI                  | 0.678           | —                    | —       | —     |
|                 | II                  | 1.000           | —                    | —       | —     |
|                 | D / I               | 0.719           | —                    | —       | —     |
| Elderly         | DD                  | 0.822           | 0.894                | —       | —     |
|                 | DI                  | 0.722           | 1.000                | —       | —     |
|                 | II                  | 0.773           | 1.000                | —       | —     |
|                 | D / I               | 1.000           | 0.812                | —       | —     |
| Old seniors     | DD                  | 0.847           | 0.558                | 0.636   | —     |
|                 | DI                  | 0.765           | 0.467                | 0.375   | —     |
|                 | II                  | 0.776           | 0.732                | 0.426   | —     |
|                 | D / I               | 0.930           | 0.670                | 0.864   | —     |
| Long-livers     | DD                  | 0.398           | 0.220                | 0.231   | 0.395 |
|                 | DI                  | 0.262           | 0.157                | 0.104   | 0.323 |
|                 | II                  | 0.704           | 0.663                | 0.326   | 0.739 |
|                 | D / I               | 0.512           | 0.381                | 0.514   | 0.560 |

**Supplementary Table S6.** Results of a pairwise comparative analysis of the genotype/alleles frequencies of the Alu-polymorphic locus Yb8AC702 of *PKHDIL1* gene in the different age groups.

| Age group       | Genotype/<br>allele | Young<br>Adults | Middle-age<br>Adults | Elderly      | Old   |
|-----------------|---------------------|-----------------|----------------------|--------------|-------|
| Young           | DD                  | —               | —                    | —            | —     |
|                 | DI                  | —               | —                    | —            | —     |
|                 | II                  | —               | —                    | —            | —     |
|                 | D / I               | —               | —                    | —            | —     |
| Middle-<br>aged | DD                  | 0.624           | —                    | —            | —     |
|                 | DI                  | 0.225           | —                    | —            | —     |
|                 | II                  | 0.411           | —                    | —            | —     |
|                 | D / I               | 0.831           | —                    | —            | —     |
| Elderly         | DD                  | 0.401           | 0.902                | —            | —     |
|                 | DI                  | <b>0.032</b>    | 0.618                | —            | —     |
|                 | II                  | 0.104           | 0.630                | —            | —     |
|                 | D / I               | 0.674           | 0.890                | —            | —     |
| Old seniors     | DD                  | 0.125           | 0.055                | <b>0.007</b> | —     |
|                 | DI                  | 0.940           | 0.182                | <b>0.013</b> | —     |
|                 | II                  | 0.086           | 0.661                | 0.930        | —     |
|                 | D / I               | 0.045           | 0.166                | 0.122        | —     |
| Long-livers     | DD                  | 0.067           | <b>0.030</b>         | <b>0.005</b> | 0.470 |
|                 | DI                  | 0.639           | 0.112                | <b>0.013</b> | 0.516 |
|                 | II                  | 0.182           | 0.795                | 0.910        | 1.000 |
|                 | D / I               | 0.046           | 0.117                | 0.108        | 0.645 |

**Supplementary Table S7.** Results of a pairwise comparative analysis of the genotype/alleles frequencies of the Alu-polymorphic locus Ya5ac2013 of *TEAD1* gene in the different age groups.

| Age group       | Genotype/<br>allele | Young<br>Adults | Middle-age<br>Adults | Elderly | Old   |
|-----------------|---------------------|-----------------|----------------------|---------|-------|
| Young           | DD                  | —               | —                    | —       | —     |
|                 | DI                  | —               | —                    | —       | —     |
|                 | II                  | —               | —                    | —       | —     |
|                 | D / I               | —               | —                    | —       | —     |
| Middle-<br>aged | DD                  | 0.558           | —                    | —       | —     |
|                 | DI                  | 0.467           | —                    | —       | —     |
|                 | II                  | 0.819           | —                    | —       | —     |
|                 | D / I               | 0.826           | —                    | —       | —     |
| Elderly         | DD                  | 0.922           | 0.650                | —       | —     |
|                 | DI                  | 0.797           | 0.314                | —       | —     |
|                 | II                  | 0.700           | 0.500                | —       | —     |
|                 | D / I               | 0.717           | 0.943                | —       | —     |
| Old seniors     | DD                  | 0.603           | 0.835                | 0.684   | —     |
|                 | DI                  | 0.644           | 0.708                | 0.423   | —     |
|                 | II                  | 1.000           | 0.757                | 0.625   | —     |
|                 | D / I               | 0.744           | 1.000                | 0.959   | —     |
| Long-livers     | DD                  | 0.735           | 0.376                | 0.589   | 0.331 |
|                 | DI                  | 0.846           | 0.656                | 0.639   | 0.863 |
|                 | II                  | 0.522           | 0.809                | 0.295   | 0.448 |
|                 | D / I               | 0.492           | 0.434                | 0.288   | 0.274 |

**Supplementary Table S8.** Results of a pairwise comparative analysis of the genotype/alleles frequencies of the Alu-polymorphic locus TPA25 of *PLAT* gene in the different age groups.

| Age group       | Genotype/<br>allele | Young<br>Adults | Middle-age<br>Adults | Elderly | Old   |
|-----------------|---------------------|-----------------|----------------------|---------|-------|
| Young           | DD                  | —               | —                    | —       | —     |
|                 | DI                  | —               | —                    | —       | —     |
|                 | II                  | —               | —                    | —       | —     |
|                 | D / I               | —               | —                    | —       | —     |
| Middle-<br>aged | DD                  | 0.921           | —                    | —       | —     |
|                 | DI                  | 0.195           | —                    | —       | —     |
|                 | II                  | 0.092           | —                    | —       | —     |
|                 | D / I               | 0.264           | —                    | —       | —     |
| Elderly         | DD                  | 0.535           | 0.479                | —       | —     |
|                 | DI                  | 0.870           | 0.136                | —       | —     |
|                 | II                  | 0.353           | <b>0.012</b>         | —       | —     |
|                 | D / I               | 0.299           | <b>0.041</b>         | —       | —     |
| Old seniors     | DD                  | 0.820           | 0.719                | 0.643   | —     |
|                 | DI                  | 0.482           | 0.405                | 0.355   | —     |
|                 | II                  | 0.618           | 0.155                | 0.098   | —     |
|                 | D / I               | 0.921           | 0.287                | 0.175   | —     |
| Long-livers     | DD                  | 0.704           | 0.832                | 0.331   | 0.494 |
|                 | DI                  | 0.417           | 0.056                | 0.526   | 0.128 |
|                 | II                  | 0.607           | <b>0.041</b>         | 0.762   | 0.262 |
|                 | D / I               | 0.950           | 0.287                | 0.374   | 0.865 |



**Supplementary Table S9.** Results of a pairwise comparative analysis of the genotype/alleles frequencies of the Alu-polymorphic locus Ya5ac1986 of *COL13A1* gene in the different age groups.

| Age group       | Genotype/<br>allele | Young<br>Adults | Middle-age<br>Adults | Elderly      | Old   |
|-----------------|---------------------|-----------------|----------------------|--------------|-------|
| Young           | DD                  | –               | –                    | –            | –     |
|                 | DI                  | –               | –                    | –            | –     |
|                 | II                  | –               | –                    | –            | –     |
|                 | D / I               | –               | –                    | –            | –     |
| Middle-<br>aged | DD                  | 0.093           | –                    | –            | –     |
|                 | DI                  | 0.685           | –                    | –            | –     |
|                 | II                  | 0.695           | –                    | –            | –     |
|                 | D / I               | 0.303           | –                    | –            | –     |
| Elderly         | DD                  | 0.329           | 0.397                | –            | –     |
|                 | DI                  | 0.180           | 0.117                | –            | –     |
|                 | II                  | 0.070           | 0.292                | –            | –     |
|                 | D / I               | 0.065           | 0.652                | –            | –     |
| Old seniors     | DD                  | 0.477           | 0.196                | 0.692        | –     |
|                 | DI                  | 0.883           | 0.531                | 0.157        | –     |
|                 | II                  | 0.567           | 1.000                | 0.112        | –     |
|                 | D / I               | 0.452           | 0.578                | 0.152        | –     |
| Long-livers     | DD                  | 0.122           | 0.864                | 0.530        | 0.247 |
|                 | DI                  | 0.399           | 0.747                | <b>0.030</b> | 0.258 |
|                 | II                  | 1.000           | 0.681                | 0.094        | 0.585 |
|                 | D / I               | 0.510           | 0.683                | 0.297        | 1.000 |

**Supplementary Table S10.** Results of a pairwise comparative analysis of the genotype/alleles frequencies of the Alu-polymorphic locus Ya5-MLS19 of *LAMA2* gene in the different age groups.

| Age group       | Genotype/<br>allele | Young<br>Adults | Middle-age<br>Adults      | Elderly      | Old                       |
|-----------------|---------------------|-----------------|---------------------------|--------------|---------------------------|
| Young           | DD                  | —               | —                         | —            | —                         |
|                 | DI                  | —               | —                         | —            | —                         |
|                 | II                  | —               | —                         | —            | —                         |
|                 | D / I               | —               | —                         | —            | —                         |
| Middle-<br>aged | DD                  | 0.135           |                           |              |                           |
|                 | DI                  | 0.161           |                           |              |                           |
|                 | II                  | 1.000           |                           |              |                           |
|                 | D / I               | 0.290           |                           |              |                           |
| Elderly         | DD                  | 0.338           | 0.498                     |              |                           |
|                 | DI                  | 0.746           | 0.267                     |              |                           |
|                 | II                  | 0.547           | 0.568                     |              |                           |
|                 | D / I               | 0.326           | 0.895                     |              |                           |
| Old seniors     | DD                  | <b>0.027</b>    | 0.932                     | 0.252        |                           |
|                 | DI                  | 0.291           | 0.506                     | 0.491        |                           |
|                 | II                  | 0.180           | 0.246                     | 0.595        |                           |
|                 | D / I               | <b>0.021</b>    | 0.440                     | 0.256        |                           |
| Long-livers     | DD                  | 0.200           | <b>0.010</b>              | <b>0.029</b> | <b>5×10<sup>-4</sup></b>  |
|                 | DI                  | <b>0.010</b>    | <b>2×10<sup>-4</sup>*</b> | <b>0.003</b> | <b>6×10<sup>-5</sup>*</b> |
|                 | II                  | 0.072           | 0.099                     | 0.213        | 0.416                     |
|                 | D / I               | 0.851           | 0.442                     | 0.458        | 0.061                     |

**Supplementary Table S11.** Estimation of the individual ORs for elements of the identified polygenic predictors of longevity.

| Genotype/<br>allele            | P                      | OR    | CI <sub>OR</sub> |
|--------------------------------|------------------------|-------|------------------|
| Comparable age periods – 18-74 |                        |       |                  |
| <i>CDH4</i> Yb8NBC516*D        | 0.033                  | 1.509 | 1.033-2.204      |
| <i>LAMA2</i> Ya5-MLS19*ID      | $2.081 \times 10^{-4}$ | 1.781 | 1.313-2.415      |
| <i>SEMA6A</i> Yb8NBC597*I      | 0.049                  | 1.406 | 1.001-1.974      |
| Comparable age periods – 18-89 |                        |       |                  |
| <i>CDH4</i> Yb8NBC516*D        | 0.014                  | 1.565 | 1.094-2.239      |
| <i>CDH4</i> Yb8NBC516*DD       | 0.006                  | 1.709 | 1.162-2.513      |
| <i>LAMA2</i> Ya5-MLS19*ID      | $4.246 \times 10^{-5}$ | 1.833 | 1.372-2.451      |
| <i>HECW1</i> Ya5NBC182*D       | 0.945                  | 0.988 | 0.703-1.388      |
| Comparable age periods – 60-89 |                        |       |                  |
| <i>LAMA2</i> Ya5-MLS19*ID      | $6.417 \times 10^{-5}$ | 1.841 | 1.365-2.483      |
| <i>HECW1</i> Ya5NBC182*I       | 0.110                  | 1.612 | 0.897-2.897      |
| Comparable age periods – 75-89 |                        |       |                  |
| <i>CDH4</i> Yb8NBC516*DD       | 0.001                  | 2.106 | 1.365-3.249      |
| <i>LAMA2</i> Ya5-MLS19*D       | 0.364                  | 1.210 | 0.802-1.826      |
| <i>HECW1</i> Ya5NBC182*I       | 0.741                  | 1.063 | 0.739-1.531      |
| <i>ACE</i> Ya5ACE*I            | 0.234                  | 1.234 | 0.873-1.744      |

Note. P – P-value; OR – odds ratio; CI<sub>OR</sub> – 95% confidence interval for OR.
